# Supplementary material
Source: publisher figshare collection journal article supplement (https://acs.figshare.com/ndownloader/files/3869038)
Supplement: Supplementary file 1 [file 3869038]

 
data_z 
 
_audit_creation_method            SHELXL-97 
_chemical_name_systematic 
; 
 ? 
; 
_chemical_name_common             ? 
_chemical_melting_point           ? 
_chemical_formula_moiety          ? 
_chemical_formula_sum 
 'C51 H44 F12 N6 O13 P2' 
_chemical_formula_weight          1238.86 
 
loop_ 
 _atom_type_symbol 
 _atom_type_description 
 _atom_type_scat_dispersion_real 
 _atom_type_scat_dispersion_imag 
 _atom_type_scat_source 
 'C'  'C'   0.0033   0.0016 
 'International Tables Vol C Tables 4.2.6.8 and 6.1.1.4' 
 'H'  'H'   0.0000   0.0000 
 'International Tables Vol C Tables 4.2.6.8 and 6.1.1.4' 
 'N'  'N'   0.0061   0.0033 
 'International Tables Vol C Tables 4.2.6.8 and 6.1.1.4' 
 'O'  'O'   0.0106   0.0060 
 'International Tables Vol C Tables 4.2.6.8 and 6.1.1.4' 
 'F'  'F'   0.0171   0.0103 
 'International Tables Vol C Tables 4.2.6.8 and 6.1.1.4' 
 'P'  'P'   0.1023   0.0942 
 'International Tables Vol C Tables 4.2.6.8 and 6.1.1.4' 
 
_symmetry_cell_setting            Orthorhombic
_symmetry_space_group_name_H-M    Pbcn 
 
loop_ 
 _symmetry_equiv_pos_as_xyz 
 'x, y, z' 
 '-x+1/2, -y+1/2, z+1/2' 
 '-x, y, -z+1/2' 
 'x+1/2, -y+1/2, -z' 
 '-x, -y, -z' 
 'x-1/2, y-1/2, -z-1/2' 
 'x, -y, z-1/2' 
 '-x-1/2, y-1/2, z' 
 
_cell_length_a                    16.4977(7) 
_cell_length_b                    18.1051(8) 
_cell_length_c                    19.5351(9) 
_cell_angle_alpha                 90.00 
_cell_angle_beta                  90.00 
_cell_angle_gamma                 90.00 
_cell_volume                      5835.0(4) 
_cell_formula_units_Z             4 
_cell_measurement_temperature     173(2) 
_cell_measurement_reflns_used     ? 
_cell_measurement_theta_min       ? 
_cell_measurement_theta_max       ? 
 
_exptl_crystal_description        block 
_exptl_crystal_colour             colorless
_exptl_crystal_size_max           0.46 
_exptl_crystal_size_mid           0.32 
_exptl_crystal_size_min           0.26 
_exptl_crystal_density_meas       ? 
_exptl_crystal_density_diffrn     1.410 
_exptl_crystal_density_method     'not measured' 
_exptl_crystal_F_000              2536 
_exptl_absorpt_coefficient_mu     0.178 
_exptl_absorpt_correction_type    multi-scan
_exptl_absorpt_correction_T_min   0.9227 
_exptl_absorpt_correction_T_max   0.9553 
_exptl_absorpt_process_details    sadabs
 
_exptl_special_details 
; 
 ? 
; 
 
_diffrn_ambient_temperature       173(2) 
_diffrn_radiation_wavelength      0.71073 
_diffrn_radiation_type            MoK\a 
_diffrn_radiation_source          'fine-focus sealed tube' 
_diffrn_radiation_monochromator   graphite 
_diffrn_measurement_device_type   ? 
_diffrn_measurement_method        ? 
_diffrn_detector_area_resol_mean  ? 
_diffrn_reflns_number             65214 
_diffrn_reflns_av_R_equivalents   0.0554 
_diffrn_reflns_av_sigmaI/netI     0.0239 
_diffrn_reflns_limit_h_min        -19 
_diffrn_reflns_limit_h_max        19 
_diffrn_reflns_limit_k_min        -16 
_diffrn_reflns_limit_k_max        21 
_diffrn_reflns_limit_l_min        -23 
_diffrn_reflns_limit_l_max        23 
_diffrn_reflns_theta_min          1.67 
_diffrn_reflns_theta_max          25.01 
_reflns_number_total              5149 
_reflns_number_gt                 3827 
_reflns_threshold_expression      >2sigma(I) 
 
_computing_data_collection        ? 
_computing_cell_refinement        ? 
_computing_data_reduction         ? 
_computing_structure_solution     'SHELXS-97 (Sheldrick, 2008)' 
_computing_structure_refinement   'SHELXL-97 (Sheldrick, 2008)' 
_computing_molecular_graphics     ? 
_computing_publication_material   ? 
 
_refine_special_details 
; 
 Refinement of F^2^ against ALL reflections.  The weighted R-factor wR and 
 goodness of fit S are based on F^2^, conventional R-factors R are based 
 on F, with F set to zero for negative F^2^. The threshold expression of 
 F^2^ > 2sigma(F^2^) is used only for calculating R-factors(gt) etc. and is 
 not relevant to the choice of reflections for refinement.  R-factors based 
 on F^2^ are statistically about twice as large as those based on F, and R- 
 factors based on ALL data will be even larger. 
; 
 
_refine_ls_structure_factor_coef  Fsqd  
_refine_ls_matrix_type            full 
_refine_ls_weighting_scheme       calc  
_refine_ls_weighting_details 
 'calc w=1/[\s^2^(Fo^2^)+(0.1201P)^2^+10.6452P] where P=(Fo^2^+2Fc^2^)/3' 
_atom_sites_solution_primary      direct 
_atom_sites_solution_secondary    difmap 
_atom_sites_solution_hydrogens    geom 
_refine_ls_hydrogen_treatment     constr 
_refine_ls_extinction_method      none 
_refine_ls_extinction_coef        ? 
_refine_ls_number_reflns          5149 
_refine_ls_number_parameters      380 
_refine_ls_number_restraints      0 
_refine_ls_R_factor_all           0.0918 
_refine_ls_R_factor_gt            0.0709 
_refine_ls_wR_factor_ref          0.2265 
_refine_ls_wR_factor_gt           0.2033 
_refine_ls_goodness_of_fit_ref    1.023 
_refine_ls_restrained_S_all       1.023 
_refine_ls_shift/su_max           0.000 
_refine_ls_shift/su_mean          0.000 
 
loop_ 
 _atom_site_label 
 _atom_site_type_symbol 
 _atom_site_fract_x 
 _atom_site_fract_y 
 _atom_site_fract_z 
 _atom_site_U_iso_or_equiv 
 _atom_site_adp_type 
 _atom_site_occupancy 
 _atom_site_symmetry_multiplicity 
 _atom_site_calc_flag 
 _atom_site_refinement_flags 
 _atom_site_disorder_assembly 
 _atom_site_disorder_group 
O02 O 0.9243(2) 0.0420(2) 0.5099(2) 0.0825(11) Uani 1 1 d . . . 
C03 C 0.7830(4) 0.0308(4) 0.5103(4) 0.098(2) Uani 1 1 d . . . 
C04 C 0.8620(3) 0.0078(4) 0.4871(3) 0.0836(19) Uani 1 1 d . . . 
C05 C 0.8699(4) -0.0294(4) 0.4179(3) 0.0887(18) Uani 1 1 d . . . 
P1 P 0.21976(7) 0.22765(8) 0.48134(6) 0.0599(4) Uani 1 1 d . . . 
O1 O 0.14003(14) 0.48795(14) 0.12707(12) 0.0389(6) Uani 1 1 d . . . 
O2 O -0.14044(15) 0.47379(14) 0.12773(12) 0.0406(6) Uani 1 1 d . . . 
O3 O 0.22653(17) 0.26897(13) 0.24499(12) 0.0392(6) Uani 1 1 d . . . 
O4 O 0.21775(16) 0.10454(14) 0.20987(13) 0.0452(7) Uani 1 1 d . . . 
O5 O 0.08235(15) 0.02344(13) 0.25625(13) 0.0398(6) Uani 1 1 d . . . 
N1 N -0.00728(19) 0.59343(16) 0.03652(15) 0.0372(7) Uani 1 1 d . . . 
N2 N -0.00011(16) 0.48009(14) 0.13267(13) 0.0281(6) Uani 1 1 d . . . 
F3 F 0.16095(18) 0.2124(2) 0.54481(15) 0.0878(10) Uani 1 1 d . . . 
C1 C -0.0743(2) 0.56303(18) 0.06150(17) 0.0358(8) Uani 1 1 d . . . 
H1A H -0.1258 0.5803 0.0467 0.043 Uiso 1 1 calc R . . 
C2 C -0.0698(2) 0.50631(18) 0.10887(15) 0.0305(7) Uani 1 1 d . . . 
C3 C 0.0655(2) 0.51259(17) 0.10803(15) 0.0289(7) Uani 1 1 d . . . 
C4 C 0.0628(2) 0.56898(18) 0.06006(17) 0.0347(8) Uani 1 1 d . . . 
H4A H 0.1119 0.5902 0.0440 0.042 Uiso 1 1 calc R . . 
C5 C 0.14833(19) 0.44767(18) 0.18820(16) 0.0295(7) Uani 1 1 d . . . 
C6 C 0.1289(2) 0.48073(18) 0.24942(16) 0.0299(7) Uani 1 1 d . . . 
H6A H 0.1045 0.5282 0.2516 0.036 Uiso 1 1 calc R . . 
C7 C 0.18213(19) 0.37839(18) 0.18261(16) 0.0303(7) Uani 1 1 d . . . 
H7A H 0.1950 0.3579 0.1392 0.036 Uiso 1 1 calc R . . 
C8 C 0.1807(2) 0.37103(18) 0.30599(16) 0.0299(7) Uani 1 1 d . . . 
H8A H 0.1925 0.3453 0.3472 0.036 Uiso 1 1 calc R . . 
C9 C 0.1967(2) 0.33932(18) 0.24277(16) 0.0300(7) Uani 1 1 d . . . 
C10 C 0.2447(2) 0.2344(2) 0.18101(18) 0.0396(8) Uani 1 1 d . . . 
H10A H 0.2856 0.2640 0.1560 0.048 Uiso 1 1 calc R . . 
H10B H 0.1951 0.2317 0.1526 0.048 Uiso 1 1 calc R . . 
C11 C 0.2769(2) 0.1581(2) 0.1935(2) 0.0465(10) Uani 1 1 d . . . 
H11A H 0.3063 0.1416 0.1521 0.056 Uiso 1 1 calc R . . 
H11B H 0.3166 0.1604 0.2315 0.056 Uiso 1 1 calc R . . 
C12 C 0.1963(2) 0.1003(2) 0.2802(2) 0.0460(9) Uani 1 1 d . . . 
H12A H 0.1586 0.1409 0.2920 0.055 Uiso 1 1 calc R . . 
H12B H 0.2454 0.1051 0.3090 0.055 Uiso 1 1 calc R . . 
C13 C 0.1566(2) 0.0273(2) 0.2929(2) 0.0511(10) Uani 1 1 d . . . 
H13A H 0.1930 -0.0131 0.2779 0.061 Uiso 1 1 calc R . . 
H13B H 0.1461 0.0212 0.3425 0.061 Uiso 1 1 calc R . . 
C14 C 0.0381(3) -0.0413(2) 0.2708(3) 0.0577(12) Uani 1 1 d . . . 
H14A H 0.0246 -0.0431 0.3202 0.069 Uiso 1 1 calc R . . 
H14B H 0.0711 -0.0854 0.2596 0.069 Uiso 1 1 calc R . . 
C15 C -0.14719(19) 0.44051(18) 0.19219(16) 0.0294(7) Uani 1 1 d . . . 
F6 F 0.27801(19) 0.2457(2) 0.42011(14) 0.0999(13) Uani 1 1 d . . . 
F2 F 0.2652(3) 0.2886(2) 0.52567(17) 0.1048(12) Uani 1 1 d . . . 
F1 F 0.1594(2) 0.2917(3) 0.4571(2) 0.1318(18) Uani 1 1 d . . . 
F5 F 0.1670(3) 0.1756(4) 0.4394(2) 0.172(3) Uani 1 1 d . . . 
F4 F 0.2801(2) 0.1707(2) 0.51280(19) 0.1211(16) Uani 1 1 d . . . 
N3 N 0.97648(17) 0.22818(15) 0.42790(14) 0.0333(7) Uani 1 1 d . . . 
C16 C 0.9688(3) 0.2253(2) 0.50383(18) 0.0441(9) Uani 1 1 d . . . 
H16A H 0.9728 0.2753 0.5226 0.066 Uiso 1 1 calc R . . 
H16B H 1.0124 0.1946 0.5228 0.066 Uiso 1 1 calc R . . 
H16C H 0.9162 0.2039 0.5161 0.066 Uiso 1 1 calc R . . 
C17 C 0.9726(2) 0.16476(19) 0.39247(18) 0.0380(8) Uani 1 1 d . . . 
H17A H 0.9643 0.1194 0.4159 0.046 Uiso 1 1 calc R . . 
C18 C 0.9806(2) 0.16498(18) 0.32243(18) 0.0358(8) Uani 1 1 d . . . 
H18A H 0.9767 0.1200 0.2976 0.043 Uiso 1 1 calc R . . 
C19 C 0.99451(18) 0.23078(17) 0.28775(17) 0.0281(7) Uani 1 1 d . . . 
C20 C 0.99736(19) 0.29529(18) 0.32624(19) 0.0321(7) Uani 1 1 d . . . 
H20A H 1.0056 0.3415 0.3043 0.039 Uiso 1 1 calc R . . 
C21 C 0.9882(2) 0.29211(19) 0.39651(19) 0.0343(8) Uani 1 1 d . . . 
H21A H 0.9904 0.3363 0.4226 0.041 Uiso 1 1 calc R . . 
O01 O 0.0000 0.6315(2) 0.2500 0.0820(17) Uani 1 2 d S . . 
C01 C 0.0238(7) 0.7393(4) 0.3119(3) 0.132(4) Uani 1 1 d . . . 
C02 C 0.0000 0.6968(3) 0.2500 0.0597(17) Uani 1 2 d S . . 
 
loop_ 
 _atom_site_aniso_label 
 _atom_site_aniso_U_11 
 _atom_site_aniso_U_22 
 _atom_site_aniso_U_33 
 _atom_site_aniso_U_23 
 _atom_site_aniso_U_13 
 _atom_site_aniso_U_12 
O02 0.077(3) 0.085(3) 0.086(3) 0.009(2) -0.017(2) -0.024(2) 
C03 0.057(3) 0.110(5) 0.127(6) -0.008(4) -0.008(3) 0.019(3) 
C04 0.050(3) 0.147(6) 0.054(3) -0.007(3) 0.008(2) -0.039(3) 
C05 0.102(5) 0.104(5) 0.060(3) -0.001(3) 0.011(3) -0.026(4) 
P1 0.0513(7) 0.0886(10) 0.0399(6) 0.0173(6) -0.0063(5) 0.0079(6) 
O1 0.0360(13) 0.0458(15) 0.0349(13) 0.0174(11) 0.0079(10) 0.0087(11) 
O2 0.0379(14) 0.0501(16) 0.0337(13) 0.0155(11) -0.0099(10) -0.0096(11) 
O3 0.0560(16) 0.0265(12) 0.0352(13) 0.0013(10) 0.0003(11) 0.0101(11) 
O4 0.0518(16) 0.0371(14) 0.0467(15) -0.0031(12) 0.0079(12) -0.0009(12) 
O5 0.0362(14) 0.0307(13) 0.0525(15) 0.0104(11) 0.0010(11) 0.0045(10) 
N1 0.0491(18) 0.0295(15) 0.0331(15) 0.0092(12) -0.0043(13) -0.0013(13) 
N2 0.0378(15) 0.0233(14) 0.0232(13) 0.0013(10) -0.0021(11) 0.0014(12) 
F3 0.0607(17) 0.144(3) 0.0591(17) 0.0310(18) -0.0021(14) -0.0098(18) 
C1 0.044(2) 0.0323(18) 0.0315(17) 0.0059(14) -0.0074(15) 0.0014(16) 
C2 0.0383(19) 0.0296(17) 0.0236(15) -0.0009(13) -0.0043(13) -0.0025(14) 
C3 0.0377(18) 0.0268(16) 0.0222(15) 0.0016(12) 0.0010(13) 0.0018(14) 
C4 0.045(2) 0.0292(17) 0.0299(17) 0.0058(14) 0.0019(15) -0.0023(15) 
C5 0.0270(16) 0.0315(17) 0.0301(17) 0.0103(13) 0.0010(13) -0.0019(14) 
C6 0.0289(17) 0.0245(16) 0.0362(18) -0.0009(13) -0.0004(13) 0.0006(13) 
C7 0.0311(17) 0.0338(18) 0.0259(15) -0.0009(13) 0.0024(13) 0.0008(14) 
C8 0.0328(17) 0.0308(17) 0.0261(16) 0.0026(13) -0.0030(13) 0.0005(14) 
C9 0.0301(16) 0.0264(17) 0.0335(17) 0.0017(13) -0.0007(13) 0.0026(14) 
C10 0.043(2) 0.036(2) 0.0397(19) -0.0025(15) 0.0078(16) 0.0054(16) 
C11 0.042(2) 0.035(2) 0.063(3) -0.0025(18) 0.0153(18) 0.0060(17) 
C12 0.036(2) 0.056(3) 0.046(2) -0.0010(18) -0.0005(17) 0.0019(18) 
C13 0.041(2) 0.055(3) 0.057(2) 0.020(2) -0.0011(18) 0.0076(19) 
C14 0.047(2) 0.029(2) 0.097(3) 0.015(2) 0.012(2) 0.0050(18) 
C15 0.0282(16) 0.0320(18) 0.0279(16) 0.0042(13) -0.0030(13) 0.0022(14) 
F6 0.067(2) 0.188(4) 0.0443(16) 0.0274(19) 0.0080(13) 0.020(2) 
F2 0.130(3) 0.114(3) 0.071(2) 0.0045(19) 0.011(2) -0.033(2) 
F1 0.083(2) 0.206(5) 0.106(3) 0.083(3) 0.014(2) 0.051(3) 
F5 0.136(4) 0.291(7) 0.088(3) -0.086(4) 0.007(3) -0.072(4) 
F4 0.121(3) 0.151(4) 0.092(2) 0.043(2) 0.022(2) 0.081(3) 
N3 0.0326(15) 0.0332(15) 0.0340(15) -0.0069(12) -0.0017(12) -0.0010(12) 
C16 0.055(2) 0.045(2) 0.0320(19) -0.0086(16) 0.0014(17) -0.0019(18) 
C17 0.052(2) 0.0257(17) 0.0358(18) -0.0040(14) 0.0036(16) -0.0058(16) 
C18 0.049(2) 0.0228(17) 0.0362(18) -0.0054(14) 0.0060(15) -0.0044(15) 
C19 0.0223(15) 0.0247(17) 0.0373(18) -0.0036(14) -0.0020(12) 0.0011(13) 
C20 0.0312(17) 0.0223(16) 0.0428(19) -0.0029(14) -0.0031(14) 0.0005(13) 
C21 0.0357(19) 0.0258(17) 0.0415(19) -0.0078(15) -0.0044(15) -0.0011(14) 
O01 0.073(3) 0.033(3) 0.140(5) 0.000 0.005(3) 0.000 
C01 0.276(12) 0.067(4) 0.054(3) -0.010(3) -0.025(5) -0.006(5) 
C02 0.075(5) 0.036(3) 0.068(4) 0.000 0.014(3) 0.000 
 
_geom_special_details 
; 
 All esds (except the esd in the dihedral angle between two l.s. planes) 
 are estimated using the full covariance matrix.  The cell esds are taken 
 into account individually in the estimation of esds in distances, angles 
 and torsion angles; correlations between esds in cell parameters are only 
 used when they are defined by crystal symmetry.  An approximate (isotropic) 
 treatment of cell esds is used for estimating esds involving l.s. planes. 
; 
 
loop_ 
 _geom_bond_atom_site_label_1 
 _geom_bond_atom_site_label_2 
 _geom_bond_distance 
 _geom_bond_site_symmetry_2 
 _geom_bond_publ_flag 
O02 C04 1.281(6) . ? 
C03 C04 1.441(8) . ? 
C04 C05 1.515(8) . ? 
P1 F5 1.521(4) . ? 
P1 F4 1.559(3) . ? 
P1 F6 1.569(3) . ? 
P1 F2 1.591(4) . ? 
P1 F3 1.598(3) . ? 
P1 F1 1.600(4) . ? 
O1 C3 1.360(4) . ? 
O1 C5 1.406(4) . ? 
O2 C2 1.357(4) . ? 
O2 C15 1.401(4) . ? 
O3 C9 1.366(4) . ? 
O3 C10 1.430(4) . ? 
O4 C11 1.411(5) . ? 
O4 C12 1.421(5) . ? 
O5 C14 1.410(5) . ? 
O5 C13 1.420(5) . ? 
N1 C4 1.321(5) . ? 
N1 C1 1.328(5) . ? 
N2 C3 1.323(4) . ? 
N2 C2 1.327(4) . ? 
C1 C2 1.384(5) . ? 
C1 H1A 0.9500 . ? 
C3 C4 1.387(4) . ? 
C4 H4A 0.9500 . ? 
C5 C6 1.375(5) . ? 
C5 C7 1.377(5) . ? 
C6 C15 1.386(4) 3 ? 
C6 H6A 0.9500 . ? 
C7 C9 1.393(4) . ? 
C7 H7A 0.9500 . ? 
C8 C15 1.374(5) 3 ? 
C8 C9 1.388(4) . ? 
C8 H8A 0.9500 . ? 
C10 C11 1.501(5) . ? 
C10 H10A 0.9900 . ? 
C10 H10B 0.9900 . ? 
C11 H11A 0.9900 . ? 
C11 H11B 0.9900 . ? 
C12 C13 1.496(6) . ? 
C12 H12A 0.9900 . ? 
C12 H12B 0.9900 . ? 
C13 H13A 0.9900 . ? 
C13 H13B 0.9900 . ? 
C14 C14 1.498(9) 3 ? 
C14 H14A 0.9900 . ? 
C14 H14B 0.9900 . ? 
C15 C8 1.374(5) 3 ? 
C15 C6 1.386(5) 3 ? 
N3 C21 1.324(4) . ? 
N3 C17 1.342(4) . ? 
N3 C16 1.490(4) . ? 
C16 H16A 0.9800 . ? 
C16 H16B 0.9800 . ? 
C16 H16C 0.9800 . ? 
C17 C18 1.375(5) . ? 
C17 H17A 0.9500 . ? 
C18 C19 1.389(5) . ? 
C18 H18A 0.9500 . ? 
C19 C20 1.390(5) . ? 
C19 C19 1.486(7) 3_755 ? 
C20 C21 1.382(5) . ? 
C20 H20A 0.9500 . ? 
C21 H21A 0.9500 . ? 
O01 C02 1.182(8) . ? 
C01 C02 1.486(7) . ? 
C02 C01 1.486(7) 3 ? 
 
loop_ 
 _geom_angle_atom_site_label_1 
 _geom_angle_atom_site_label_2 
 _geom_angle_atom_site_label_3 
 _geom_angle 
 _geom_angle_site_symmetry_1 
 _geom_angle_site_symmetry_3 
 _geom_angle_publ_flag 
O02 C04 C03 118.5(6) . . ? 
O02 C04 C05 117.1(5) . . ? 
C03 C04 C05 119.1(5) . . ? 
F5 P1 F4 99.7(3) . . ? 
F5 P1 F6 94.0(2) . . ? 
F4 P1 F6 92.7(2) . . ? 
F5 P1 F2 172.8(3) . . ? 
F4 P1 F2 86.7(3) . . ? 
F6 P1 F2 88.9(2) . . ? 
F5 P1 F3 87.9(2) . . ? 
F4 P1 F3 88.14(19) . . ? 
F6 P1 F3 177.8(2) . . ? 
F2 P1 F3 89.06(19) . . ? 
F5 P1 F1 86.1(3) . . ? 
F4 P1 F1 173.3(3) . . ? 
F6 P1 F1 90.22(19) . . ? 
F2 P1 F1 87.3(3) . . ? 
F3 P1 F1 88.70(19) . . ? 
C3 O1 C5 119.4(2) . . ? 
C2 O2 C15 119.9(2) . . ? 
C9 O3 C10 117.1(3) . . ? 
C11 O4 C12 115.3(3) . . ? 
C14 O5 C13 112.7(3) . . ? 
C4 N1 C1 117.5(3) . . ? 
C3 N2 C2 114.9(3) . . ? 
N1 C1 C2 120.5(3) . . ? 
N1 C1 H1A 119.7 . . ? 
C2 C1 H1A 119.7 . . ? 
N2 C2 O2 119.6(3) . . ? 
N2 C2 C1 123.1(3) . . ? 
O2 C2 C1 117.2(3) . . ? 
N2 C3 O1 119.6(3) . . ? 
N2 C3 C4 123.2(3) . . ? 
O1 C3 C4 117.1(3) . . ? 
N1 C4 C3 120.7(3) . . ? 
N1 C4 H4A 119.7 . . ? 
C3 C4 H4A 119.7 . . ? 
C6 C5 C7 124.0(3) . . ? 
C6 C5 O1 119.4(3) . . ? 
C7 C5 O1 116.4(3) . . ? 
C5 C6 C15 115.9(3) . 3 ? 
C5 C6 H6A 122.1 . . ? 
C15 C6 H6A 122.1 3 . ? 
C5 C7 C9 117.8(3) . . ? 
C5 C7 H7A 121.1 . . ? 
C9 C7 H7A 121.1 . . ? 
C15 C8 C9 118.6(3) 3 . ? 
C15 C8 H8A 120.7 3 . ? 
C9 C8 H8A 120.7 . . ? 
O3 C9 C8 115.2(3) . . ? 
O3 C9 C7 124.3(3) . . ? 
C8 C9 C7 120.5(3) . . ? 
O3 C10 C11 109.5(3) . . ? 
O3 C10 H10A 109.8 . . ? 
C11 C10 H10A 109.8 . . ? 
O3 C10 H10B 109.8 . . ? 
C11 C10 H10B 109.8 . . ? 
H10A C10 H10B 108.2 . . ? 
O4 C11 C10 115.2(3) . . ? 
O4 C11 H11A 108.5 . . ? 
C10 C11 H11A 108.5 . . ? 
O4 C11 H11B 108.5 . . ? 
C10 C11 H11B 108.5 . . ? 
H11A C11 H11B 107.5 . . ? 
O4 C12 C13 108.5(3) . . ? 
O4 C12 H12A 110.0 . . ? 
C13 C12 H12A 110.0 . . ? 
O4 C12 H12B 110.0 . . ? 
C13 C12 H12B 110.0 . . ? 
H12A C12 H12B 108.4 . . ? 
O5 C13 C12 109.7(3) . . ? 
O5 C13 H13A 109.7 . . ? 
C12 C13 H13A 109.7 . . ? 
O5 C13 H13B 109.7 . . ? 
C12 C13 H13B 109.7 . . ? 
H13A C13 H13B 108.2 . . ? 
O5 C14 C14 108.9(3) . 3 ? 
O5 C14 H14A 109.9 . . ? 
C14 C14 H14A 109.9 3 . ? 
O5 C14 H14B 109.9 . . ? 
C14 C14 H14B 109.9 3 . ? 
H14A C14 H14B 108.3 . . ? 
C8 C15 C6 123.2(3) 3 3 ? 
C8 C15 O2 116.7(3) 3 . ? 
C6 C15 O2 119.8(3) 3 . ? 
C21 N3 C17 121.1(3) . . ? 
C21 N3 C16 120.3(3) . . ? 
C17 N3 C16 118.6(3) . . ? 
N3 C16 H16A 109.5 . . ? 
N3 C16 H16B 109.5 . . ? 
H16A C16 H16B 109.5 . . ? 
N3 C16 H16C 109.5 . . ? 
H16A C16 H16C 109.5 . . ? 
H16B C16 H16C 109.5 . . ? 
N3 C17 C18 120.4(3) . . ? 
N3 C17 H17A 119.8 . . ? 
C18 C17 H17A 119.8 . . ? 
C17 C18 C19 120.2(3) . . ? 
C17 C18 H18A 119.9 . . ? 
C19 C18 H18A 119.9 . . ? 
C18 C19 C20 117.5(3) . . ? 
C18 C19 C19 120.3(2) . 3_755 ? 
C20 C19 C19 122.2(2) . 3_755 ? 
C21 C20 C19 119.9(3) . . ? 
C21 C20 H20A 120.0 . . ? 
C19 C20 H20A 120.0 . . ? 
N3 C21 C20 120.8(3) . . ? 
N3 C21 H21A 119.6 . . ? 
C20 C21 H21A 119.6 . . ? 
O01 C02 C01 121.2(3) . . ? 
O01 C02 C01 121.2(3) . 3 ? 
C01 C02 C01 117.6(7) . 3 ? 
 
loop_ 
 _geom_torsion_atom_site_label_1 
 _geom_torsion_atom_site_label_2 
 _geom_torsion_atom_site_label_3 
 _geom_torsion_atom_site_label_4 
 _geom_torsion 
 _geom_torsion_site_symmetry_1 
 _geom_torsion_site_symmetry_2 
 _geom_torsion_site_symmetry_3 
 _geom_torsion_site_symmetry_4 
 _geom_torsion_publ_flag 
C4 N1 C1 C2 -1.9(5) . . . . ? 
C3 N2 C2 O2 176.0(3) . . . . ? 
C3 N2 C2 C1 0.4(5) . . . . ? 
C15 O2 C2 N2 31.0(4) . . . . ? 
C15 O2 C2 C1 -153.2(3) . . . . ? 
N1 C1 C2 N2 1.1(5) . . . . ? 
N1 C1 C2 O2 -174.6(3) . . . . ? 
C2 N2 C3 O1 -177.4(3) . . . . ? 
C2 N2 C3 C4 -1.1(5) . . . . ? 
C5 O1 C3 N2 -21.9(4) . . . . ? 
C5 O1 C3 C4 161.5(3) . . . . ? 
C1 N1 C4 C3 1.3(5) . . . . ? 
N2 C3 C4 N1 0.3(5) . . . . ? 
O1 C3 C4 N1 176.7(3) . . . . ? 
C3 O1 C5 C6 -62.0(4) . . . . ? 
C3 O1 C5 C7 123.0(3) . . . . ? 
C7 C5 C6 C15 1.5(5) . . . 3 ? 
O1 C5 C6 C15 -173.1(3) . . . 3 ? 
C6 C5 C7 C9 0.6(5) . . . . ? 
O1 C5 C7 C9 175.3(3) . . . . ? 
C10 O3 C9 C8 -179.4(3) . . . . ? 
C10 O3 C9 C7 1.0(5) . . . . ? 
C15 C8 C9 O3 -177.2(3) 3 . . . ? 
C15 C8 C9 C7 2.5(5) 3 . . . ? 
C5 C7 C9 O3 177.0(3) . . . . ? 
C5 C7 C9 C8 -2.7(5) . . . . ? 
C9 O3 C10 C11 179.8(3) . . . . ? 
C12 O4 C11 C10 -85.6(4) . . . . ? 
O3 C10 C11 O4 77.5(4) . . . . ? 
C11 O4 C12 C13 -161.1(3) . . . . ? 
C14 O5 C13 C12 -174.6(4) . . . . ? 
O4 C12 C13 O5 -65.0(4) . . . . ? 
C13 O5 C14 C14 -179.0(4) . . . 3 ? 
C2 O2 C15 C8 -132.7(3) . . . 3 ? 
C2 O2 C15 C6 54.3(4) . . . 3 ? 
C21 N3 C17 C18 -0.1(6) . . . . ? 
C16 N3 C17 C18 -179.0(3) . . . . ? 
N3 C17 C18 C19 1.3(6) . . . . ? 
C17 C18 C19 C20 -1.9(5) . . . . ? 
C17 C18 C19 C19 178.3(4) . . . 3_755 ? 
C18 C19 C20 C21 1.3(5) . . . . ? 
C19 C19 C20 C21 -178.8(4) 3_755 . . . ? 
C17 N3 C21 C20 -0.4(5) . . . . ? 
C16 N3 C21 C20 178.5(3) . . . . ? 
C19 C20 C21 N3 -0.2(5) . . . . ? 
 
_diffrn_measured_fraction_theta_max    0.999 
_diffrn_reflns_theta_full              25.01 
_diffrn_measured_fraction_theta_full   0.999 
_refine_diff_density_max    1.108 
_refine_diff_density_min   -0.742 
_refine_diff_density_rms    0.075 
